# Supplementary material for: Lyophilized platelets versus cryopreserved platelets for management of bleeding in thrombocytopenic dogs: A multicenter randomized clinical trial
Source: PubMed Central journal article supplement — J Vet Intern Med. 2020 Oct 5;34(6):2384–97. doi: 10.1111/jvim.15922 (PMC7694820; doi:10.1111/jvim.15922), 2020-10-05
Supplement: JVIM-34-2384-s002.pdf [file JVIM-34-2384-s002.pdf]

CANINE ITP: DAILY BLEEDING ASSESSMENT TOOL (DOGIBAT)

CASE ID \_\_\_\_\_

DATES (WEEK 1) \_\_\_\_\_

| Site                                            | Bleeding grade                                                                                       |                                            |                                           | Score given<br>Enter Grade OR X = not collected |       |       |       |       |       |       |
|-------------------------------------------------|------------------------------------------------------------------------------------------------------|--------------------------------------------|-------------------------------------------|-------------------------------------------------|-------|-------|-------|-------|-------|-------|
|                                                 | 0                                                                                                    | 1                                          | 2                                         | Day 1                                           | Day 2 | Day 3 | Day 4 | Day 5 | Day 6 | Day 7 |
| Skin                                            | No                                                                                                   | Petechiae /ecchymoses<br>Single site       | Petechiae/ecchymoses<br>> 1 anatomic site |                                                 |       |       |       |       |       |       |
| Catheter/venipuncture/other cutaneous bleed     | No                                                                                                   | Self-limiting/<br>< 5 min                  | > 5 min and/or<br>intervention to control |                                                 |       |       |       |       |       |       |
| Oral mucosa                                     | No                                                                                                   | Petechiae                                  | Frank hemorrhage                          |                                                 |       |       |       |       |       |       |
| Intraocular                                     | No                                                                                                   | Funduscopy                                 | Hyphema                                   |                                                 |       |       |       |       |       |       |
| Epistaxis                                       | No                                                                                                   | Unilateral and<br>< 5 min                  | Bilateral or > 5 min                      |                                                 |       |       |       |       |       |       |
| Gastrointestinal                                | Occult blood -<br>(Hema-chek™<br>Guaiac -)                                                           | Occult blood +<br>(Hema-chek™<br>Guaiac +) | Hematemesis,<br>hematochezia, melena      |                                                 |       |       |       |       |       |       |
| Urinary                                         | No                                                                                                   | Microscopic<br>(dipstick)                  | Macroscopic                               |                                                 |       |       |       |       |       |       |
| Pulmonary (suspected/observed)                  | No                                                                                                   | N/A                                        | Yes                                       |                                                 |       |       |       |       |       |       |
| Intracranial hemorrhage<br>(suspected/observed) | No                                                                                                   | N/A                                        | Yes                                       |                                                 |       |       |       |       |       |       |
| Total Score (max =18)                           |                                                                                                      |                                            |                                           |                                                 |       |       |       |       |       |       |
| Platelet count (x10 <sup>3</sup> /uL)           | Indicate M (manual) or A (automated)                                                                 |                                            |                                           |                                                 |       |       |       |       |       |       |
| Transfusion days                                | Indicate FWB (fresh whole blood) or PC (packed cells) or PL<br>(platelet rich plasma or concentrate) |                                            |                                           |                                                 |       |       |       |       |       |       |
