# Supplementary material for: Lyophilized platelets versus cryopreserved platelets for management of bleeding in thrombocytopenic dogs: A multicenter randomized clinical trial
Source: PubMed Central journal article supplement — J Vet Intern Med. 2020 Oct 5;34(6):2384–97. doi: 10.1111/jvim.15922 (PMC7694820; doi:10.1111/jvim.15922), 2020-10-05
Supplement: JVIM-34-2384-s003.pdf [file JVIM-34-2384-s003.pdf]

**Case Report Form**

**Clinical Trial 1-2017-K9**

**Evaluation of Stable Plate RXTM in Thrombocytopenic Canine Patients: A Multicenter Clinical Trial**

Patient ID: \_\_\_\_\_

Client ID: \_\_\_\_\_

Hospital Case Number: \_\_\_\_\_

Study Site: \_\_\_\_\_

Randomization Assignment:    Test Article    Control

Consent Signed:    YES    Uploaded:    YES

*\*If Consent Letter is not signed and filed on the bodevet website within 8 hours of acceptance in the study, compensation for laboratory testing in this patient may be compromised.*

Contact Information (Client)

NAME: \_\_\_\_\_

ADDRESS: \_\_\_\_\_

\_\_\_\_\_  
\_\_\_\_\_

PHONE: Home \_\_\_\_\_

Cell \_\_\_\_\_

EMAIL: \_\_\_\_\_

Signalment (Patient)

NAME: \_\_\_\_\_

BREED: \_\_\_\_\_

DOB: \_\_\_\_\_

SEX: \_\_\_\_\_ INTACT    NEUTER

DESCRIPTION (Color, haircoat): \_\_\_\_\_

Previous illness, thrombocytopenic episodes or surgery:

\_\_\_\_\_  
\_\_\_\_\_

Evaluation of Stable Plate RXTM in Thrombocytopenic Canine Patients: A Multicenter Clinical Trial

**TIMEPOINT ZERO (0)**

**PATIENT IDENTIFICATION:** \_\_\_\_\_

**PATIENT NAME:** \_\_\_\_\_

Physical examination: Please complete your standard physical examination form and upload to the website.

Temperature: \_\_\_\_\_ °F      Pulse Rate: \_\_\_\_\_      Pulse quality: \_\_\_\_\_

Respiratory Rate: \_\_\_\_\_      Respiratory characterization: \_\_\_\_\_

Notable abnormalities: \_\_\_\_\_

\_\_\_\_\_

Weight: \_\_\_\_\_ (kg)

DOGIBAT Score: \_\_\_\_\_ Please upload score card to the website.

CBC: Please scan and upload your CBC data to the website.

RBC: \_\_\_\_\_ Hematocrit: \_\_\_\_\_ WBC: \_\_\_\_\_

Platelets: \_\_\_\_\_ Manual confirmation: YES NO

MPV: \_\_\_\_\_

BMBT: \_\_\_\_\_ ANATOMICAL LOCATION OF TEST: \_\_\_\_\_

Prothrombin Time: \_\_\_\_\_ Normal range: \_\_\_\_\_

Activated Prothrombin Time: \_\_\_\_\_ Normal range: \_\_\_\_\_

TEG abnormalities: (if performed) \_\_\_\_\_

TGA (if performed) Mean Peak Thrombin \_\_\_\_\_

Mean Lag Time \_\_\_\_\_

Notable biochemical abnormalities: \_\_\_\_\_

\_\_\_\_\_

Current medications:

\_\_\_\_\_

Evaluation of Stable Plate RXTM in Thrombocytopenic Canine Patients: A Multicenter Clinical Trial

**TIMEPOINT 1 HOUR POSTADMINISTRATION (1)**

**PATIENT IDENTIFICATION:** \_\_\_\_\_

**PATIENT NAME:** \_\_\_\_\_

Physical examination: Please complete your standard physical examination form and upload to the website.

Temperature: \_\_\_\_\_ °F      Pulse Rate: \_\_\_\_\_      Pulse quality: \_\_\_\_\_

Respiratory Rate: \_\_\_\_\_      Respiratory characterization: \_\_\_\_\_

Notable abnormalities: \_\_\_\_\_

\_\_\_\_\_

Weight: \_\_\_\_\_ (kg)

DOGIBAT Score: \_\_\_\_\_ Please upload score card to the website.

CBC: Please scan and upload your CBC data to the website.

RBC: \_\_\_\_\_ Hematocrit: \_\_\_\_\_ WBC: \_\_\_\_\_

Platelets: \_\_\_\_\_ Manual confirmation: YES NO

MPV: \_\_\_\_\_

BMBT: \_\_\_\_\_ ANATOMICAL LOCATION OF TEST: \_\_\_\_\_

Prothrombin Time: \_\_\_\_\_ Normal range: \_\_\_\_\_

Activated Prothrombin Time: \_\_\_\_\_ Normal range: \_\_\_\_\_

TEG abnormalities: (if performed) \_\_\_\_\_

TGA (if performed) Mean Peak Thrombin \_\_\_\_\_

Mean Lag Time \_\_\_\_\_

Notable biochemical abnormalities: \_\_\_\_\_

\_\_\_\_\_

Current medications:

\_\_\_\_\_

Evaluation of Stable Plate RXTM in Thrombocytopenic Canine Patients: A Multicenter Clinical Trial

**TIMEPOINT 24 POSTADMINISTRATION (3)**

**PATIENT IDENTIFICATION:** \_\_\_\_\_

**PATIENT NAME:** \_\_\_\_\_

Physical examination: Please complete your standard physical examination form and upload to the website.

Temperature: \_\_\_\_\_ °F      Pulse Rate: \_\_\_\_\_      Pulse quality: \_\_\_\_\_

Respiratory Rate: \_\_\_\_\_      Respiratory characterization: \_\_\_\_\_

Notable abnormalities: \_\_\_\_\_

\_\_\_\_\_

Weight: \_\_\_\_\_ (kg)

DOGIBAT Score: \_\_\_\_\_ Please upload score card to the website.

CBC: Please scan and upload your CBC data to the website.

RBC: \_\_\_\_\_ Hematocrit: \_\_\_\_\_ WBC: \_\_\_\_\_

Platelets: \_\_\_\_\_ Manual confirmation: YES NO

MPV: \_\_\_\_\_

BMBT: \_\_\_\_\_ ANATOMICAL LOCATION OF TEST: \_\_\_\_\_

Prothrombin Time: \_\_\_\_\_ Normal range: \_\_\_\_\_

Activated Prothrombin Time: \_\_\_\_\_ Normal range: \_\_\_\_\_

TEG abnormalities: (if performed) \_\_\_\_\_

TGA (if performed) Mean Peak Thrombin \_\_\_\_\_

Mean Lag Time \_\_\_\_\_

Notable biochemical abnormalities: \_\_\_\_\_

\_\_\_\_\_

Current medications:

\_\_\_\_\_

**Case Report Form**

**Clinical Trial 1-2017-K9**

**Evaluation of Stable Plate RXTM in Thrombocytopenic Canine Patients: A Multicenter Clinical Trial**

DISCHARGE DATE: \_\_\_\_\_

DISCHARGE MEDICATIONS: \_\_\_\_\_

THROMBOCYTOPENIC? YES NO

TOTAL HOSPITAL STAY(in days): \_\_\_\_\_

HAVE ALL MATERIALS BEEN UPLOADED TO THE WEBSITE? \_\_\_\_\_ Initial here

**FOLLOWUP PHONE CALL (WEEK 1 POST DISCHARGE)**

What is the dog's clinical status? \_\_\_\_\_

What medications is the dog taking at home? \_\_\_\_\_

Bleeding episodes noted at home? \_\_\_\_\_

Vomiting YES NO

Diarrhea YES NO

Hematemesis YES NO

Hematochezia YES NO

Platelet count if known \_\_\_\_\_

**FOLLOWUP PHONE CALL ( WEEK 2 POST DISCHARGE)**

What is the dog's clinical status? \_\_\_\_\_

What medications is the dog taking at home? \_\_\_\_\_

Bleeding episodes noted at home? \_\_\_\_\_

Vomiting YES NO

Diarrhea YES NO

Hematemesis YES NO

Hematochezia YES NO

Platelet count if known \_\_\_\_\_

---
