# Supplementary material for: Lyophilized platelets versus cryopreserved platelets for management of bleeding in thrombocytopenic dogs: A multicenter randomized clinical trial
Source: PubMed Central journal article supplement — J Vet Intern Med. 2020 Oct 5;34(6):2384–97. doi: 10.1111/jvim.15922 (PMC7694820; doi:10.1111/jvim.15922), 2020-10-05
Supplement: JVIM-34-2384-s004.pdf [file JVIM-34-2384-s004.pdf]

| <b>Category</b> | <b>Test Identification</b>                 | <b>Acceptance criteria</b>           |
|-----------------|--------------------------------------------|--------------------------------------|
| Sterility       | Aerobic culture                            | Negative                             |
|                 | Anaerobic culture                          | Negative                             |
|                 | Endotoxin (limulus ameocyte lysate)        | <2 EU/mL                             |
| Purity          | Residual moisture                          | <2%                                  |
| Potency         | Thrombin Generation Assay (Thrombinoscope) | Peak height 46-105nm                 |
| Identity        | Flow cytometry                             | Annexin V 87-100%                    |
|                 |                                            | CD61 83-100%                         |
| Strength        | Automated cell count                       | > 1.5 x 10 <sup>9</sup> particles/mL |
