# Supplementary material for: Lyophilized platelets versus cryopreserved platelets for management of bleeding in thrombocytopenic dogs: A multicenter randomized clinical trial
Source: PubMed Central journal article supplement — J Vet Intern Med. 2020 Oct 5;34(6):2384–97. doi: 10.1111/jvim.15922 (PMC7694820; doi:10.1111/jvim.15922), 2020-10-05
Supplement: JVIM-34-2384-s005.pdf [file JVIM-34-2384-s005.pdf]

### XIII. Appendix A

## Rehydration Instructions for StablePlate RX™

### 1. MATERIALS AND EQUIPMENT

- 4.1.1 Sterile 10-12ml syringes
- 4.1.2 Sterile sterile water for injection (WFI) for injection quality
- 4.1.3 Sterile 18 gauge needles
- 4.1.4 Stable Plate RX™

### 2. SAFETY

- 2.1 CAUTION: Canine derived blood products are used in this procedure. Standard BSL-2 protocols must be followed. In case of accidental exposure, follow necessary decontamination procedures, taking advantage of eye wash stations and/or showers as necessary.

### 3. DEFINITIONS AND ABBREVIATIONS

- 3.1 RT = Room temperature, standard RT is 18-24°C
- 3.2 PPE = Personal protective equipment, usually refers to (at minimum) lab gloves, lab coats, and proper attire.
- 3.3 BSL-2 = Biosafety level 2. A level of biosafety considered appropriate for agents that can cause human disease, but whose potential for transmission is limited.

### 4. PROCEDURE

- 4.1 Put on proper PPE.
- 4.2 Remove the aluminum seal to expose rubber stopper.
- 4.3 Draw 10ml of sterile water using a sterile syringe and needle. This volume is specific to the 10ml vial fill; confirm the fill size on the vial.
- 4.4 Rehydrate the StablePlateRX™ vial with the appropriate volume of sterile WFI, directing the stream of liquid against the glass side of the vial rather than directly into the cake.  
**Record the start time of rehydration.**
- 4.5 Gently swirl the rehydrated StablePlateRX™ vial for approximately 5-10 seconds to assist in the rehydration process.
- 4.6 Allow the rehydrated material to rest for 10 minutes at RT to allow for full rehydration before use.
- 4.7 Swirl the StablePlateRX™ every few minutes (at approximately 5 minutes) while rehydrating.
- 4.8 If clumps are observed, swirl StablePlateRX™ and let rest for another 5 minutes.

**XIV. Appendix B****Thawing Instructions for DMSO Cryopreserved Platelets****1. MATERIALS AND EQUIPMENT**

- 1.1.1 37°C water bath
- 1.1.2 Stopwatch or timer
- 1.1.3 DMSO Cryopreserved platelets

**2. SAFETY**

- 2.1 CAUTION: Canine derived blood products and DMSO are used in this procedure. Standard BSL-2 protocols must be followed. In case of accidental exposure, follow necessary decontamination procedures, taking advantage of eye wash stations and/or showers as necessary.

**3. DEFINITIONS AND ABBREVIATIONS**

- 3.1 PPE = Personal protective equipment, usually refers to (at minimum) lab gloves, lab coats, and proper attire.
- 3.2 BSL-2 = Biosafety level 2. A level of biosafety considered appropriate for agents that can cause human disease, but whose potential for transmission is limited.

**4. PROCEDURE**

- 4.1 Put on proper PPE.
- 4.2 Carefully place the DMSO Cryopreserved platelet unit(s) for thawing in a sealable plastic bag(s).
- 4.3 Verify the temperature of the waterbath at 37°C.
- 4.4 Gently float the unit in the 37°C waterbath.
- 4.5 Start the timer or stopwatch upon entrance into the waterbath.
- 4.6 Evaluate every 10 minutes for evidence of product thaw by gently swirling package.
- 4.7 Remove from the waterbath and sealable plastic bag when product is thawed.
- 4.8 Remove from cardboard container and bubble overwrap to evaluate the product bag for breakage.
- 4.9 If clumps are observed, swirl DMSO cryopreserved platelets and let rest for another 5 minutes.
- 4.10 If clumps persist that are greater than 0.5cm in size, discard the unit and record on the appropriate form.

**XV. Appendix C****ADMINISTRATION OF STABLEPLATE RX™****5. MATERIALS AND EQUIPMENT**

- 4.1.5 Appropriate sterile syringes for dosing
- 4.1.6 Syringe pump for administration (Optional)
- 4.1.7 Stable Plate RX™

**6. SAFETY**

- 6.1 CAUTION: Canine derived blood products are used in this procedure. Standard BSL-2 protocols must be followed. In case of accidental exposure, follow necessary decontamination procedures, taking advantage of eye wash stations and/or showers as necessary.

**7. DEFINITIONS AND ABBREVIATIONS**

- 7.1 RT = Room temperature, standard RT is 18-24°C
- 7.2 PPE = Personal protective equipment, usually refers to (at minimum) lab gloves, lab coats, and proper attire.
- 7.3 BSL-2 = Biosafety level 2. A level of biosafety considered appropriate for agents that can cause human disease, but whose potential for transmission is limited.
- 7.4 ml = milliliters
- 7.5 kg = kilogram

**4. DOSING**

- 7.6 The designated dose for canine patients is  $3 \times 10^9$ /kg.
- 7.7 Each vial contains approximately  $1.5 \times 10^9$  lyophilized platelets/ml.
- 7.8 One vial provides dosing for 5kg.
- 7.9 One vial provides 10 milliliters (ml) of product.
- 7.10 **Calculate dosing using the formula below:**
  - 7.10.1 **ml of StablePlateRX™ = [(weight of patient in kg) / 5kg] X 10mls**

**7.11 Calculate number of vials using the formula below:**

7.11.1 **no. of vials = Number of mls/ 10mls**

7.11.2 NOTE: Round to the next number if vial size is not even.

7.11.3 Partial vials cannot be reused.

**8. PROCEDURE**

**8.1** Put on proper PPE.

**8.2** Select the number of rehydrated vials to provide the calculated dose.

**8.3** Rehydrate using provided instructions.

**8.4** *Product must be utilized within 1 hour of rehydration.*

**8.5** Confirm patency of venous access in patient by flushing with normal saline. NOTE: Catheter should be at least 20 gauge.

**8.6** Draw calculated dose into the appropriate sized syringe.

**8.7** Administer through standard extension set or injection port at 1ml/min. NOTE: A syringe pump may be utilized for administration.

**8.8** NOTE TIME POINT AT THE END OF ADMINISTRATION!

**8.9** Flush extension set with an appropriate amount of saline after completing the infusion.

**8.10** Monitor for transfusion and/or anaphylactic response.

**8.11** Collect 1 hour timepoint data when appropriate.

## **XVII. Appendix D**

### **ADMINISTRATION OF DMSO CRYOPRESERVED PLATELETS**

#### **9. MATERIALS AND EQUIPMENT**

- 4.1.8 Standard In Line Blood Filter
- 4.1.9 DMSO cryopreserved platelet unit(s)

#### **10. SAFETY**

- 10.1 CAUTION: Canine derived blood products are used in this procedure. Standard BSL-2 protocols must be followed. In case of accidental exposure, follow necessary decontamination procedures, taking advantage of eye wash stations and/or showers as necessary. This product contains 6% DMSO, a known carcinogen.

#### **11. DEFINITIONS AND ABBREVIATIONS**

- 11.1 PPE = Personal protective equipment, usually refers to (at minimum) lab gloves, lab coats, and proper attire.
- 11.2 BSL-2 = Biosafety level 2. A level of biosafety considered appropriate for agents that can cause human disease, but whose potential for transmission is limited.
- 11.3 ml = milliliters
- 11.4 kg = kilogram

#### **4. DOSING**

- 11.5 The designated dose for canine patients is  $3 \times 10^9/\text{kg}$ .
- 11.6 Each unit contains approximately  $1.5 \times 10^{10}$  platelets.
- 11.7 One unit provides dosing for 5kg.
- 11.8 One unit provides 20 to 100 milliliters (ml) of product.
- 11.9 **Calculate dosing using the formula below:**
  - 11.9.1 **No. of platelets = (Weight of the dog in kg)( $3.0 \times 10^9$ )**
- 11.10 **Calculate number of units using the formula below:**
  - 11.10.1 **no. of units = No. of platelets/ $1.5 \times 10^{10}$**
  - 11.10.2 NOTE: Round to the next number if unit size is not even.

11.10.3 Partial units cannot be reused.

## 12. PROCEDURE

- 12.1 Put on proper PPE.
- 12.2 Select the number of units to provide the calculated dose
- 12.3 Warm unit(s) according to instructions in Appendix B.
- 12.4 *Product must be utilized within 1 hour of warming.*
- 12.5 Confirm patency of venous access in patient by flushing with normal saline. NOTE: Catheter should be at least 20 gauge.
- 12.6 Using aseptic technique, attach an in-line blood filter to allow administration by gravity flow.
- 12.7 Administer through standard extension set or injection port at 1ml/min. NOTE: A pump is NOT allowed for administration.
- 12.8 NOTE TIME POINT AT THE END OF ADMINISTRATION!
- 12.9 Flush extension set with an appropriate amount of saline after completing the infusion.
- 12.10 Monitor for transfusion and/or anaphylactic response.
- 12.11 Collect 1 hour timepoint data when appropriate.
