# Supplementary figures and images for: Lyophilized platelets versus cryopreserved platelets for management of bleeding in thrombocytopenic dogs: A multicenter randomized clinical trial
Source: PubMed Central journal article supplement — J Vet Intern Med. 2020 Oct 5;34(6):2384–97. doi: 10.1111/jvim.15922 (PMC7694820; doi:10.1111/jvim.15922), 2020-10-05

Fig. S1.

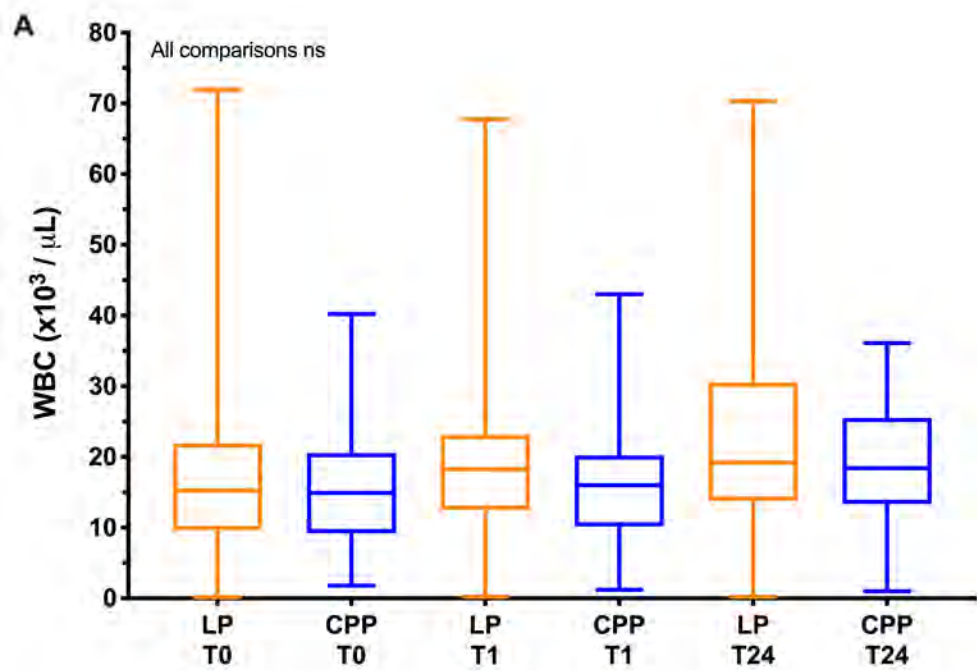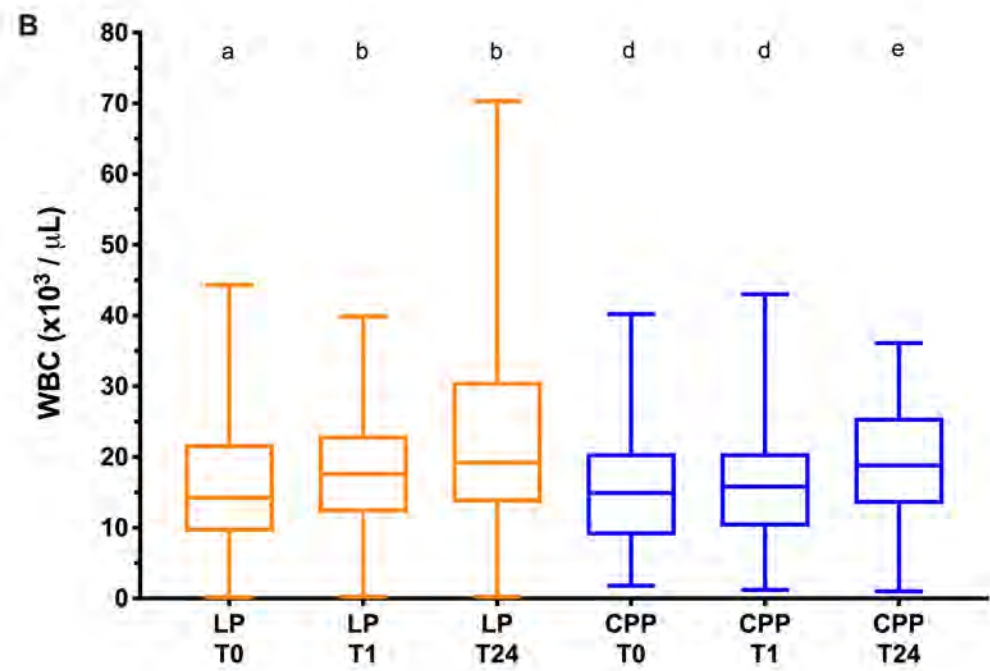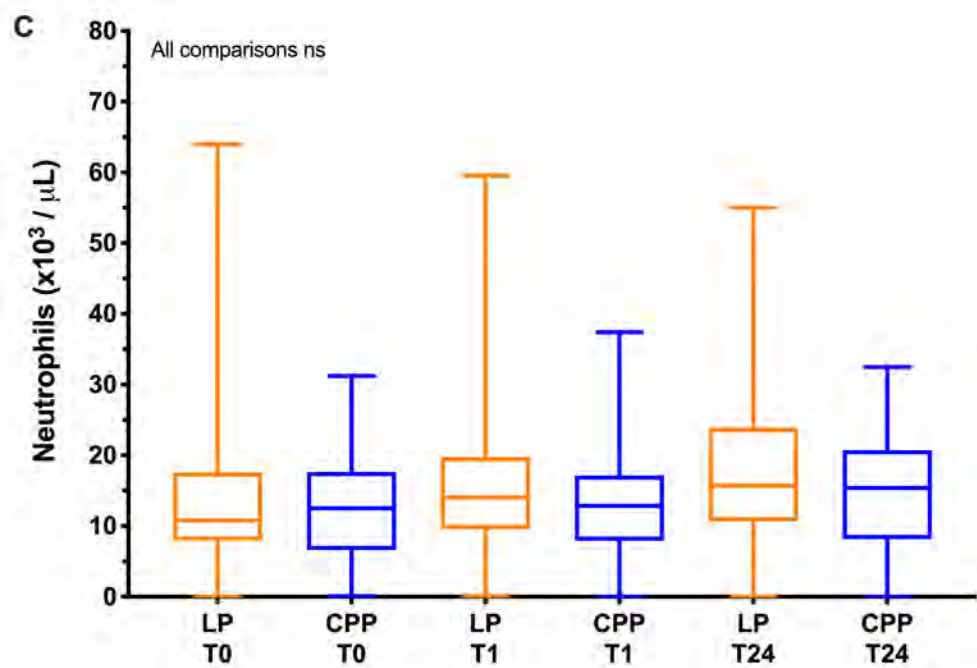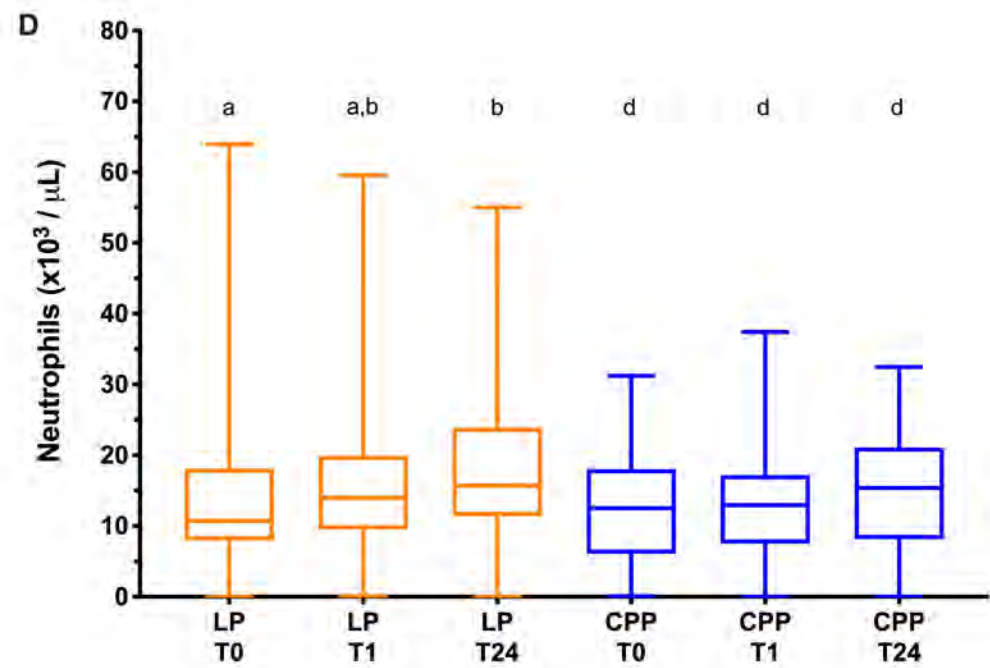

Supplement: JVIM-34-2384-s001.pdf [file JVIM-34-2384-s001.pdf]
